# Supplementary material for: Genetic complexity impacts the clinical outcome of follicular lymphoma patients
Source: PubMed Central journal article supplement (PMC7801414; doi:10.1038/s41408-020-00395-y), 2021-01-11
Supplement: 41408_2020_395_MOESM2_ESM.pdf [file 41408_2020_395_MOESM2_ESM.pdf]

Supplementary Figure S1. Genetic landscape of FL.

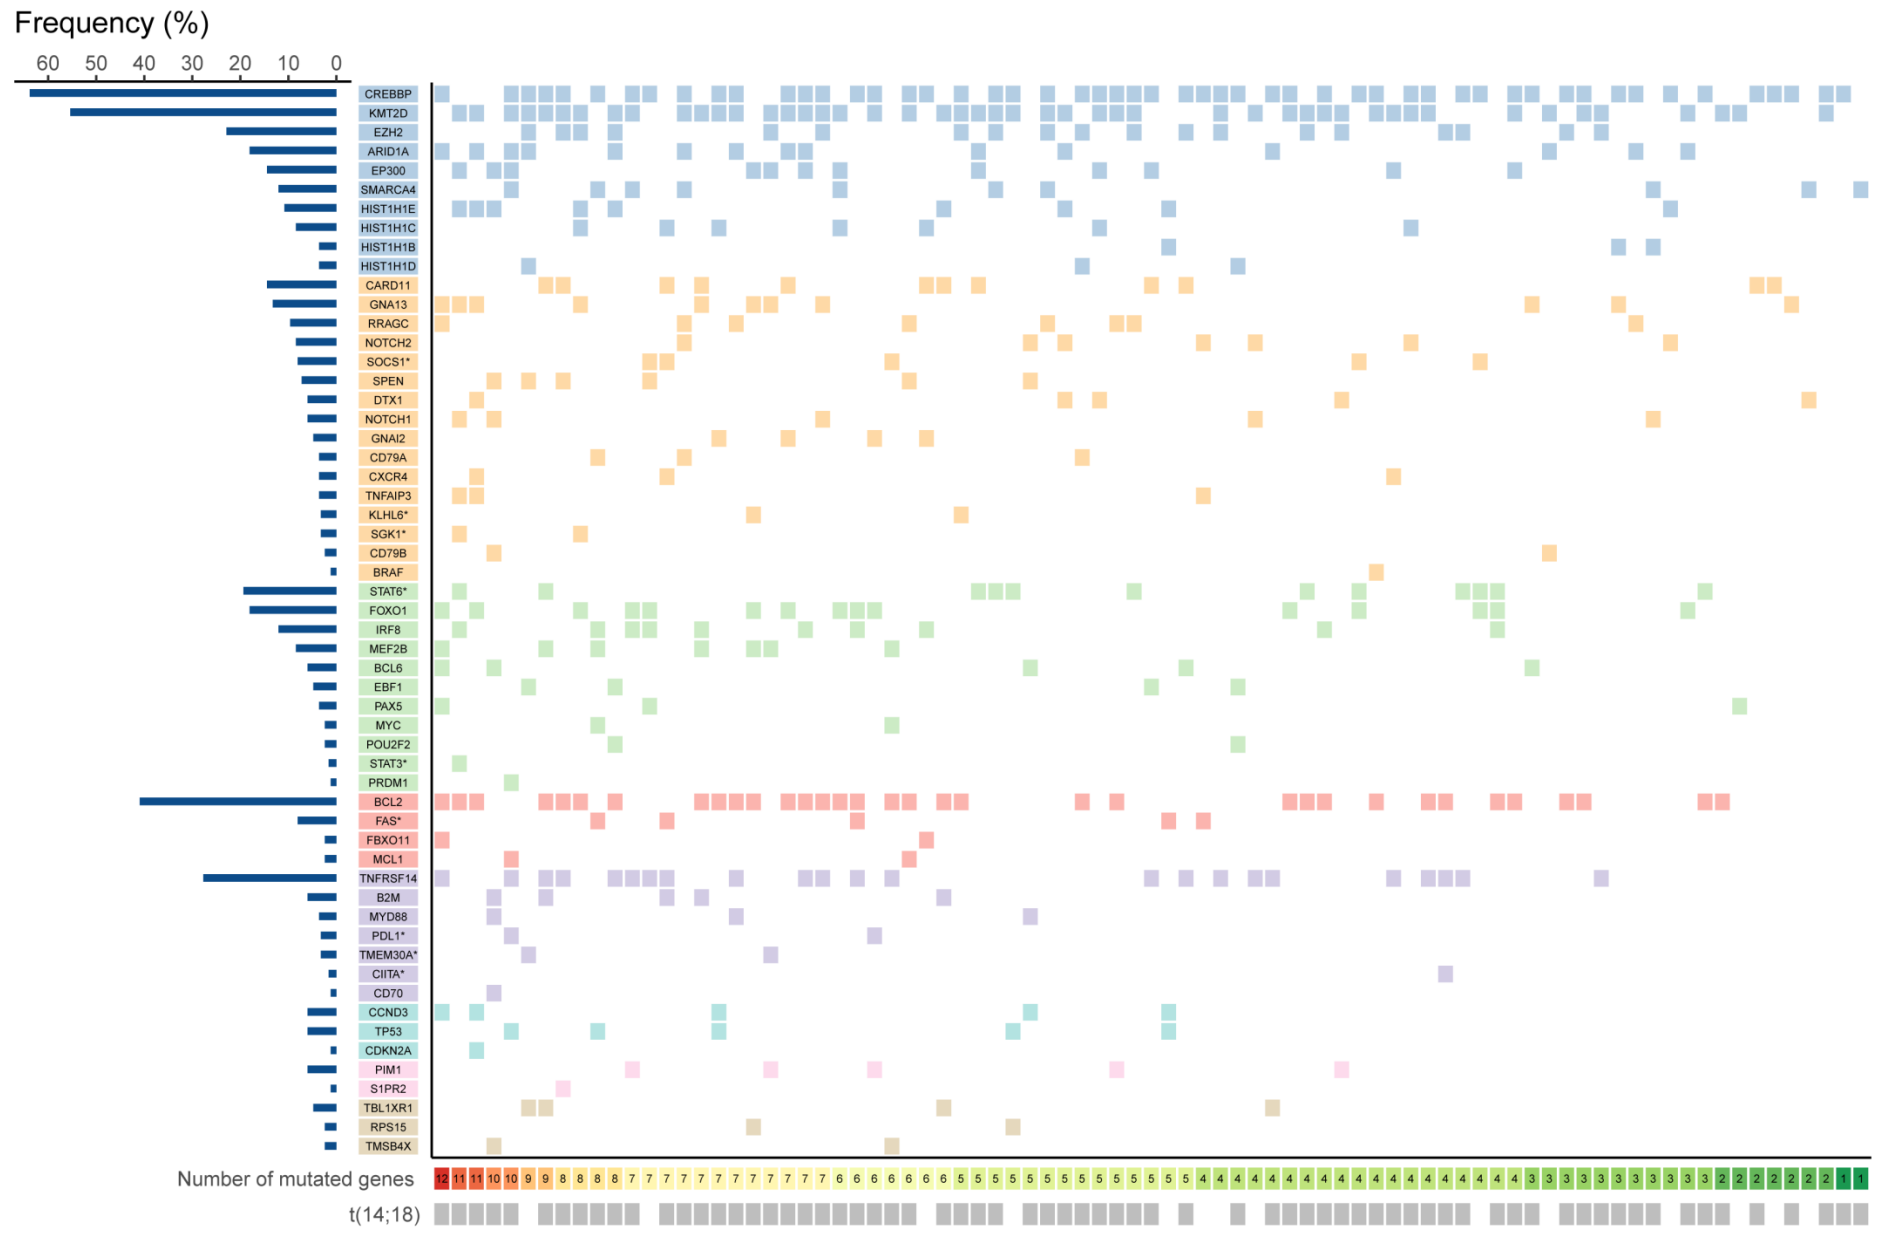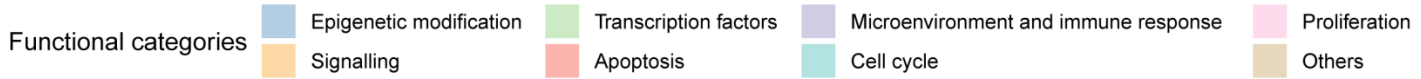

**Supplementary Figure S2.** Mutation distribution across the genes with a mutation frequency greater than 10%.

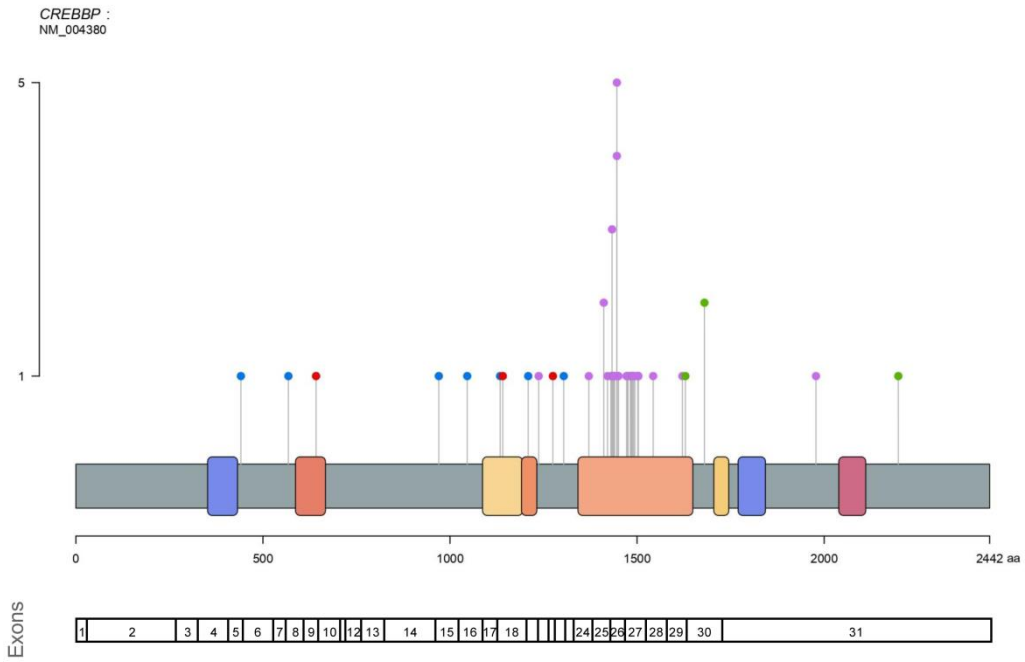

- Nonsense mutations
  - Missense mutations
  - Frameshift indels
  - Inframe indels
- Domains
- KAT11
  - Bromo cbp like
  - zf-TAZ
  - KIX
  - Creb binding
  - DUF902
  - ZZ CBP

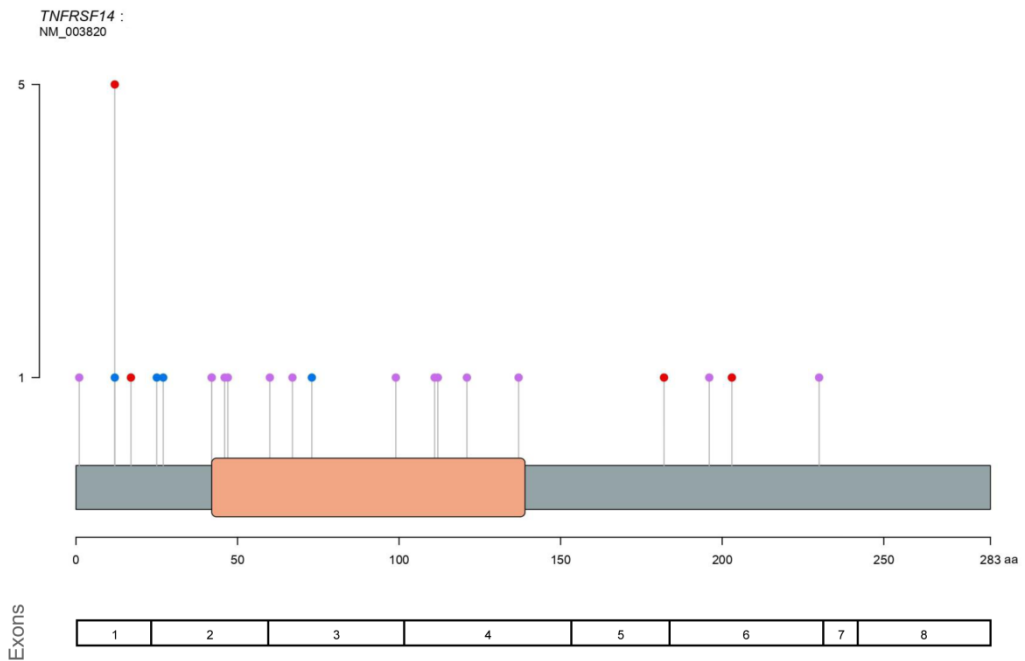

- Nonsense mutations
  - Missense mutations
  - Frameshift indels
  - Inframe indels
- Domains
- TNFR

EZH2 :  
NM\_004456

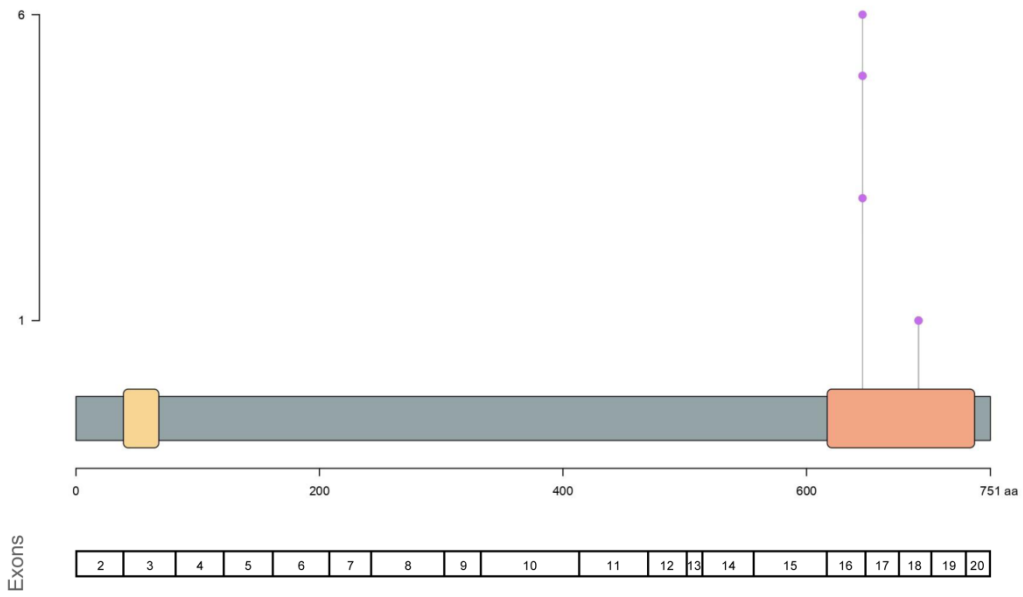

- Nonsense mutations
  - Missense mutations
  - Frameshift indels
  - Inframe indels
- Domains
- SET
  - EZH2 WD-Binding

STAT6 :  
NM\_003153

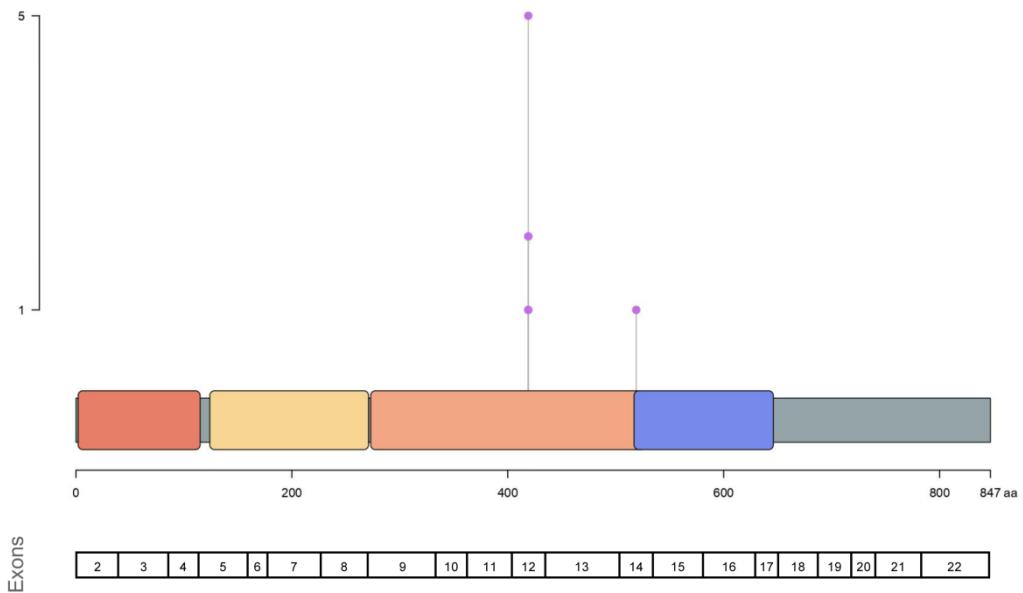

- Nonsense mutations
  - Missense mutations
  - Frameshift indels
  - Inframe indels
- Domains
- STAT bind
  - STAT alpha
  - SH2 STAT6
  - STAT int

FOXO1 :  
NM\_002015

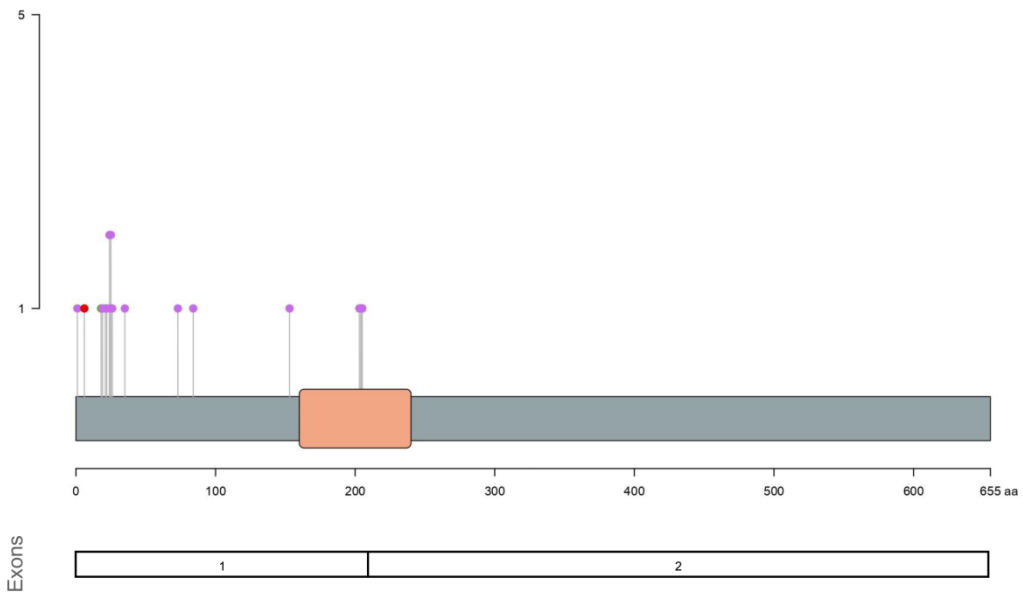

- Nonsense mutations
  - Missense mutations
  - Frameshift indels
  - Inframe indels
- Domains
- FH

EP300 :  
NM\_001429

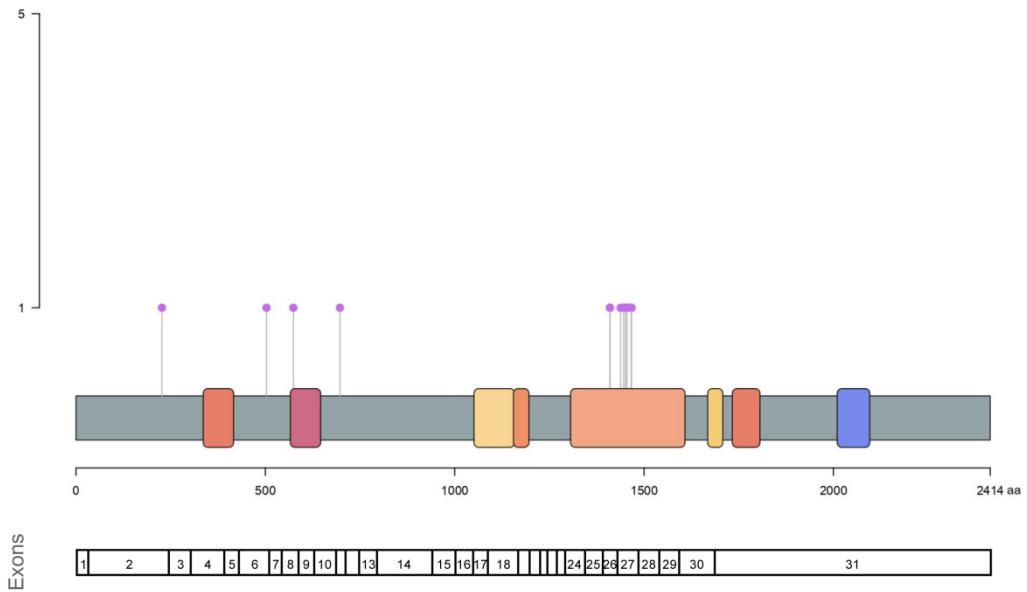

- Nonsense mutations
  - Missense mutations
  - Frameshift indels
  - Inframe indels
- Domains
- KAT11
  - Bromo cbp like
  - Creb binding
  - zf-TAZ
  - KIX
  - DUF902
  - ZZ CBP

CARD11 :  
NM\_032415

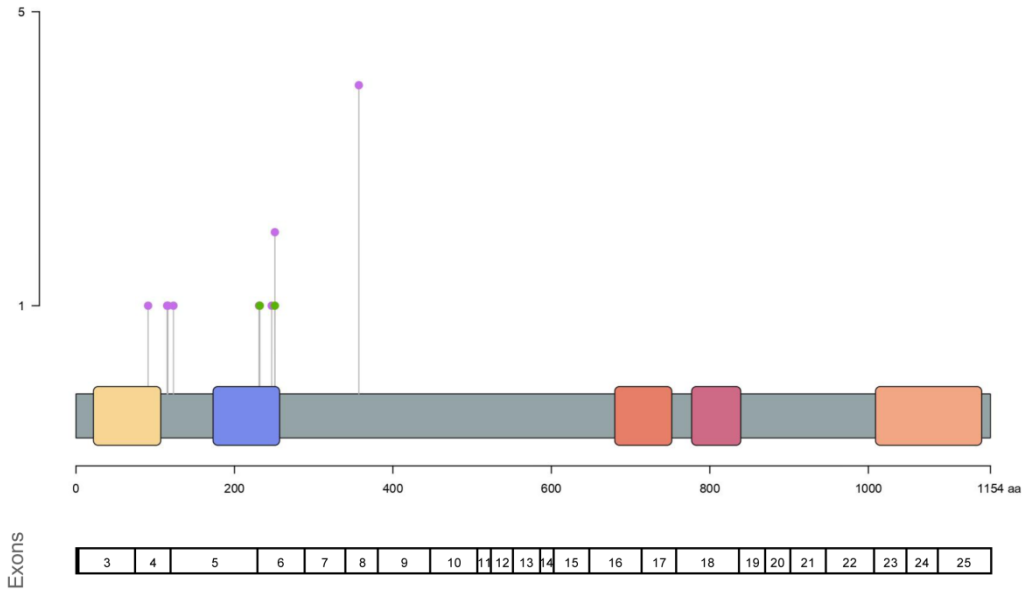

- Nonsense mutations
  - Missense mutations
  - Frameshift indels
  - Inframe indels
- Domains
- P-loop NTPase
  - CARD CARD11 CARMA1
  - BAR
  - PDZ signaling
  - SH3

KMT2D :  
NM\_003482

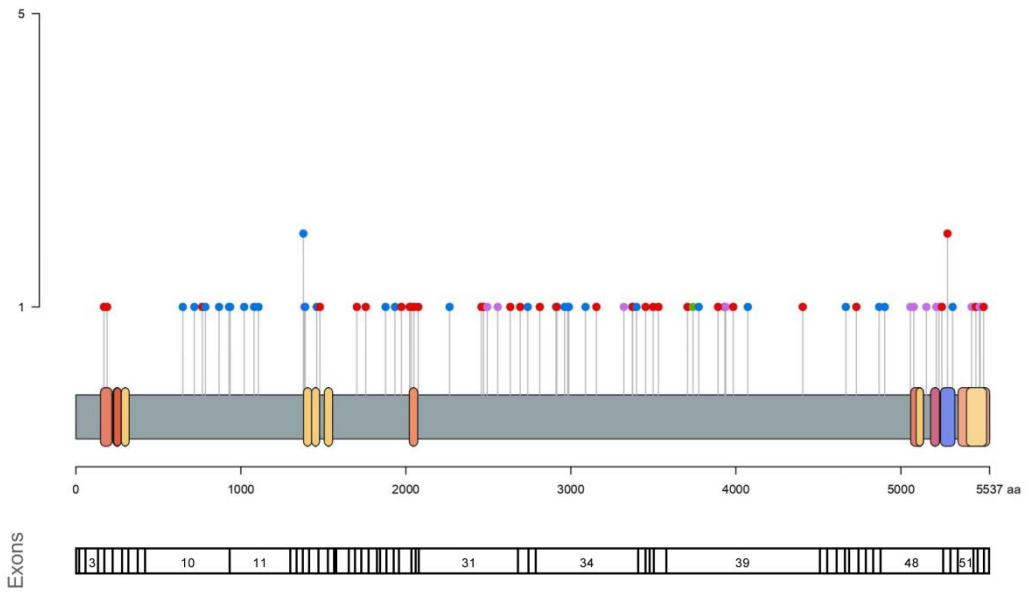

- Nonsense mutations
  - Missense mutations
  - Frameshift indels
  - Inframe indels
- Domains
- COG2940
  - SET
  - FYRC
  - zf-HC5HC2H
  - FYRN
  - HMG-box
  - PHD
  - zf-C3HC4 2
  - RING

*BCL2* :  
NM\_000633

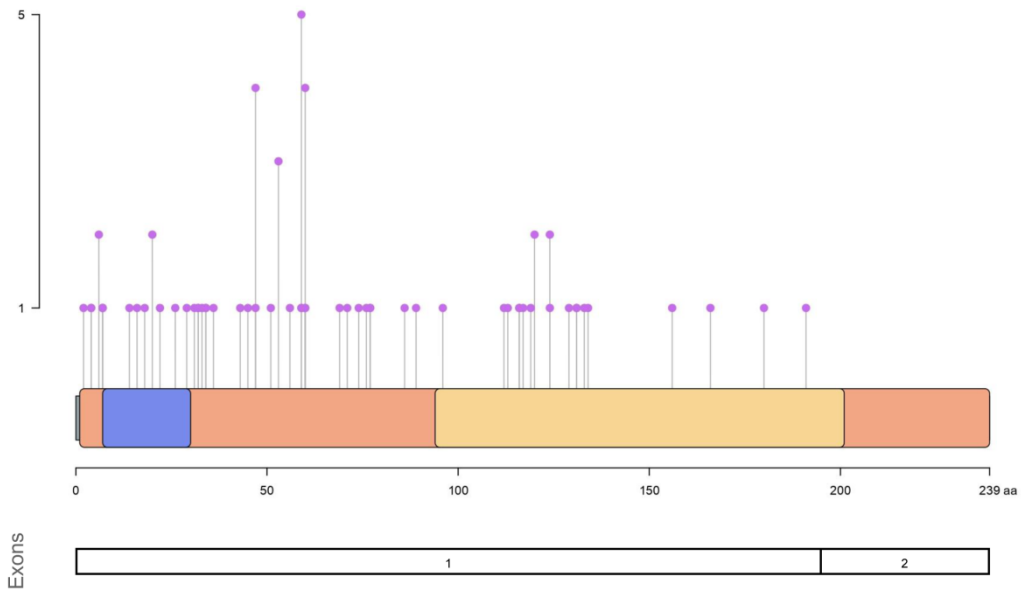

- Nonsense mutations
  - Missense mutations
  - Frameshift indels
  - Inframe indels
- Domains
- bcl-2
  - Bcl-2 like
  - BH4

*ARID1A* :  
NM\_006015

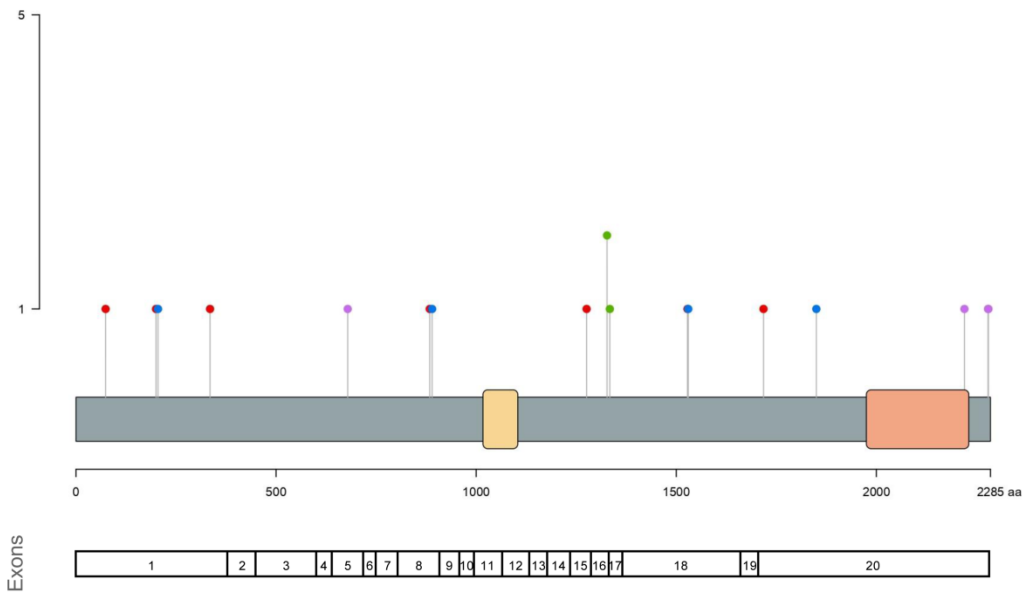

- Nonsense mutations
  - Missense mutations
  - Frameshift indels
  - Inframe indels
- Domains
- DUF3518
  - ARID

GNA13 :  
NM\_006572

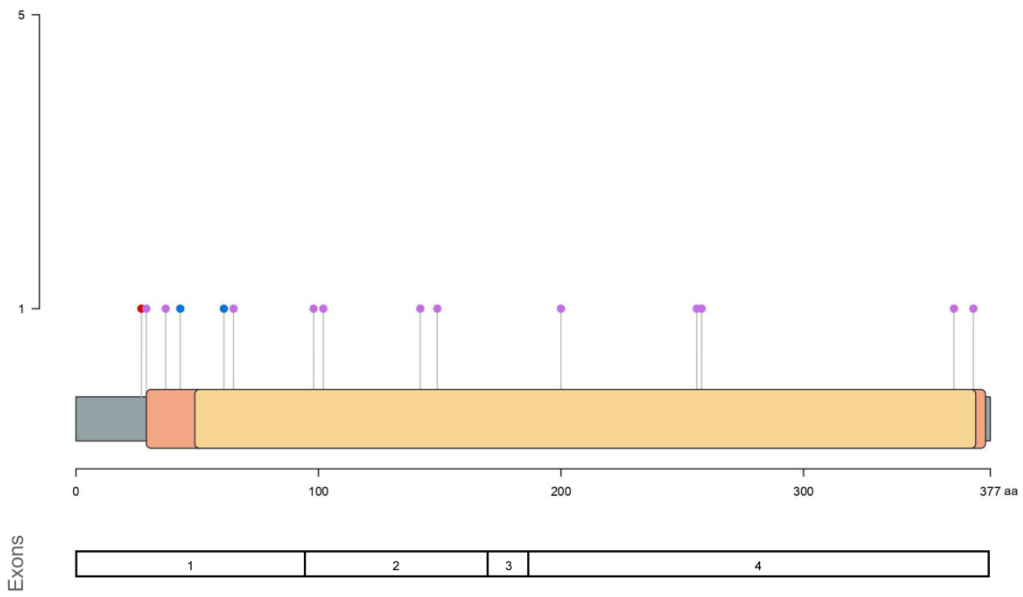

- Nonsense mutations
  - Missense mutations
  - Frameshift indels
  - Inframe indels
- Domains
- G alpha
  - G-alpha

IRF8 :  
NM\_002163

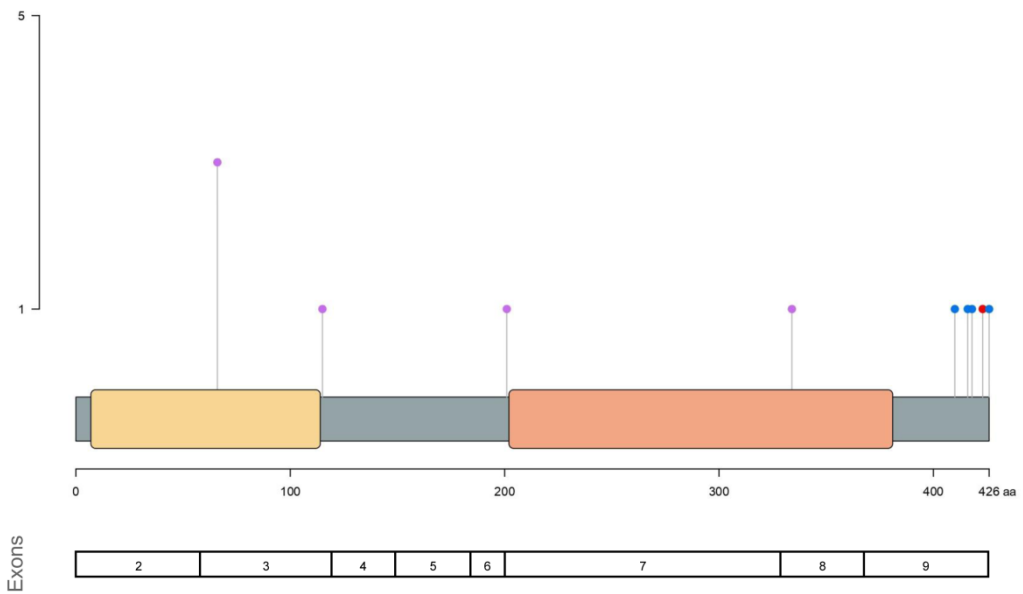

- Nonsense mutations
  - Missense mutations
  - Frameshift indels
  - Inframe indels
- Domains
- IRF-3
  - IRF

SMARCA4 :  
NM\_001128849

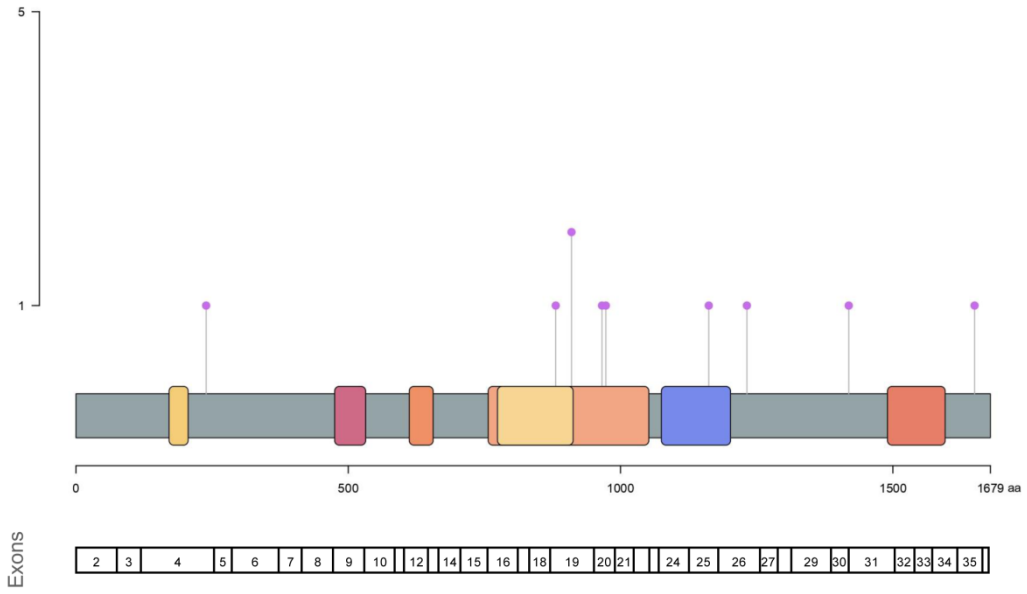

- Nonsense mutations
  - Missense mutations
  - Frameshift indels
  - Inframe indels
- Domains
- SNF2 N
  - DEXDc
  - HELICc
  - Bromo SNF2L2
  - HSA
  - BRK
  - QLQ

HIST1H1E :  
NM\_005321

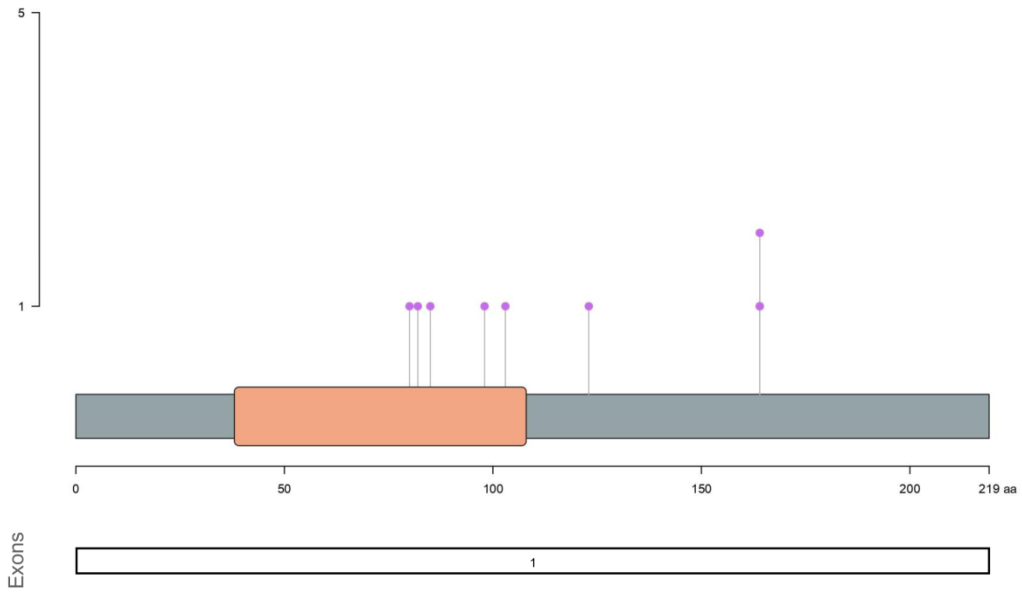

- Nonsense mutations
  - Missense mutations
  - Frameshift indels
  - Inframe indels
- Domains
- H15



**Supplementary Figure S3.** Kaplan-Meier analysis of (A) failure-free survival and overall survival by m7-FLIPI model, and (B) overall survival by FLIPI index in FL patients treated with R-ICT (n=47). The vertical dashed line indicates 5-year follow-up.

### A. m7-FLIPI

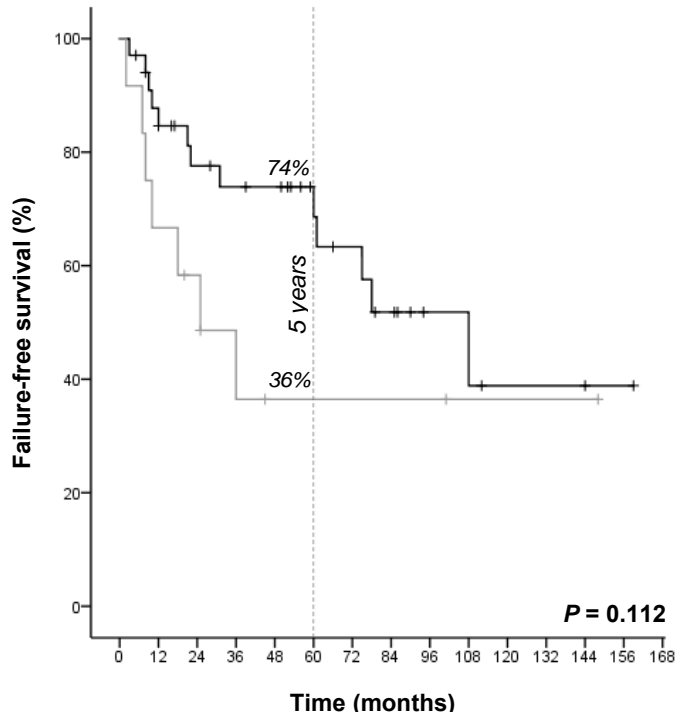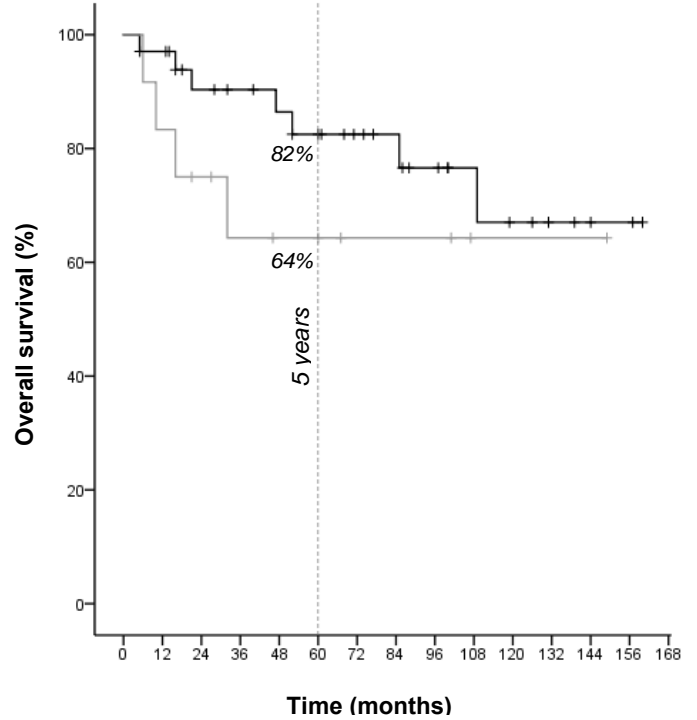

— Low-risk m7-FLIPI (n=34) — High-risk m7-FLIPI (n=12)

— Low-risk m7-FLIPI (n=34) — High-risk m7-FLIPI (n=12)

### B. FLIPI

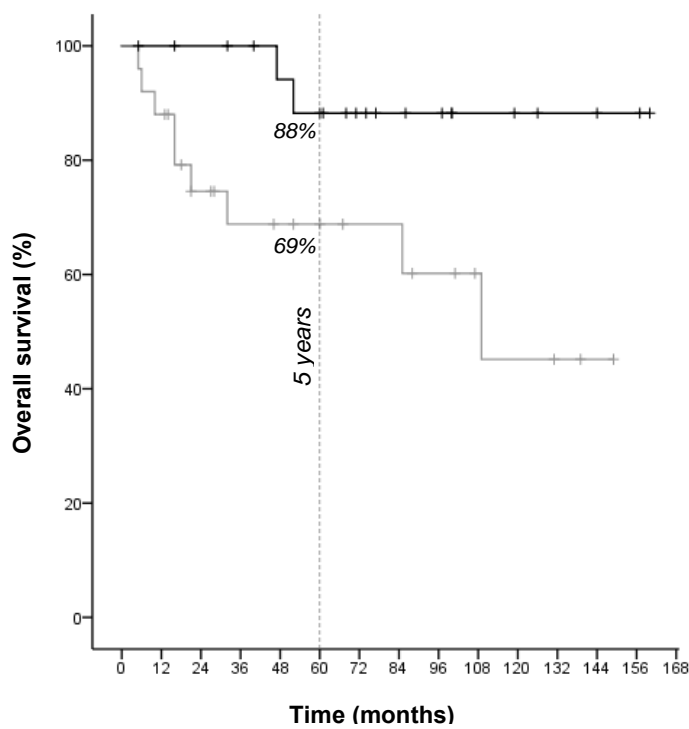

— Low/Intermediate-risk FLIPI (n=21) — High-risk FLIPI (n=25)
